# Supplementary material for: High sensitivity detection of Plasmodium species reveals positive correlations between infections of different species, shifts in age distribution and reduced local variation in Papua New Guinea
Source: PubMed Central journal article supplement (PMC2657150; doi:10.1186/1475-2875-8-41), 2009-03-11
Supplement: 1475-2875-8-41-S2.pdf [file 1475-2875-8-41-S2.pdf]

Additional File 2: Comparison of observed species mixtures in different regions by light microscopy.

---

|             | <b>Burui</b><br>n = 489 | <b>Wombisa</b><br>n = 491 | <b>Ulupu</b><br>n = 521 | <b>Brukham</b><br>n = 515 | <b>Ilaita</b><br>n = 511 |
|-------------|-------------------------|---------------------------|-------------------------|---------------------------|--------------------------|
| neg         | 310                     | 292                       | 293                     | 269                       | 242                      |
| Pf          | 126                     | 136                       | 127                     | 145                       | 126                      |
| Pv          | 40                      | 44                        | 68                      | 50                        | 74                       |
| Pm          | 8                       | 9                         | 11                      | 13                        | 43                       |
| Po          | 0                       | 0                         | 0                       | 0                         | 0                        |
| Pf+Pv       | 4                       | 9                         | 20                      | 28                        | 25                       |
| Pf+Pm       | 1                       | 1                         | 1                       | 6                         | 0                        |
| Pf+Po       | 0                       | 0                         | 0                       | 0                         | 0                        |
| Pv+Pm       | 0                       | 0                         | 1                       | 3                         | 1                        |
| Pv+Po       | 0                       | 0                         | 0                       | 0                         | 0                        |
| Pm+Po       | 0                       | 0                         | 0                       | 0                         | 0                        |
| Pf+Pv+Pm    | 0                       | 0                         | 0                       | 1                         | 0                        |
| Pf+Pv+Po    | 0                       | 0                         | 0                       | 0                         | 0                        |
| Pf+Pm+Po    | 0                       | 0                         | 0                       | 0                         | 0                        |
| Pv+Pm+Po    | 0                       | 0                         | 0                       | 0                         | 0                        |
| Pf+Pv+Pm+Po | 0                       | 0                         | 0                       | 0                         | 0                        |

---

Pf = *P. falciparum*, Pv = *P. vivax*, Pm = *P. malariae*, Po = *P. ovale*
